# Supplementary material for: Mesoporous NiCo2O4 networks with enhanced performance as counter electrodes for dye-sensitized solar cells
Source: Royal Society of Chemistry journal article supplement (doi:10.1039/c7dt00267j), 2017-01-01
Supplement: c7dt00267j1.pdf [file c7dt00267j1.pdf]

# Mesoporous $\text{NiCo}_2\text{O}_4$ networks with enhanced performances as counter electrodes for dye-sensitized solar cells

Chenle Zhang<sup>#1,2</sup>, Libo Deng<sup>#1</sup>, Peixin Zhang<sup>\*1,3</sup>, Xiangzhong Ren<sup>1</sup>, Yongliang Li<sup>1</sup>  
and Tingshu He<sup>2</sup>

<sup>1</sup>College of Chemistry and Environmental Engineering, Shenzhen University,  
Shenzhen, Guangdong 518060, P. R. China

<sup>2</sup>School of Materials & Mineral Resources, Xi'an University of Architecture and  
Technology, Xi'an, Shanxi 710055, P.R China

<sup>3</sup>Shenzhen Key Laboratory of Environmental Chemistry and Ecological Remediation,  
Shenzhen 518060, P. R. China

## Supporting Information

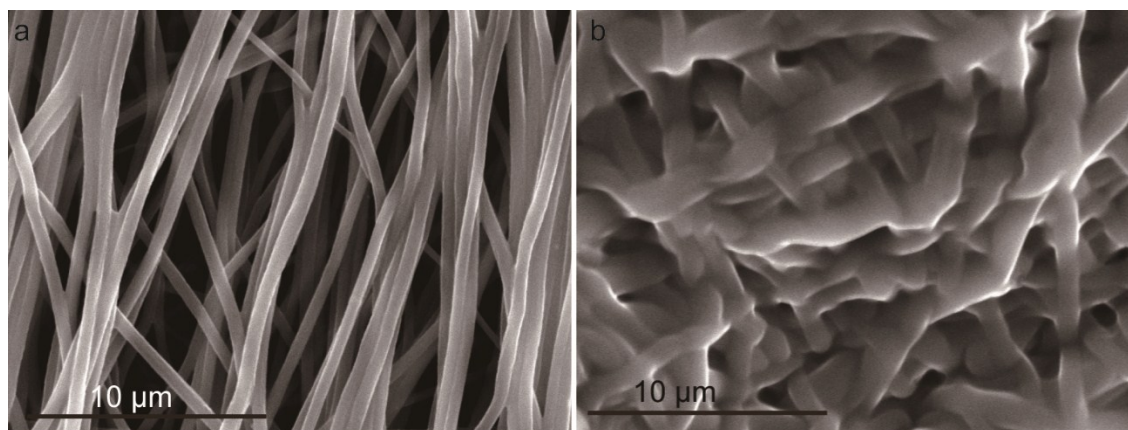

**Fig. S1** SEM images of: (a) the precursor fibers for NP-100 and (b) the precursor fibers for NP-400.

---

\* Corresponding author: pxzhang@szu.edu.cn; Tel: +86-755-26536157

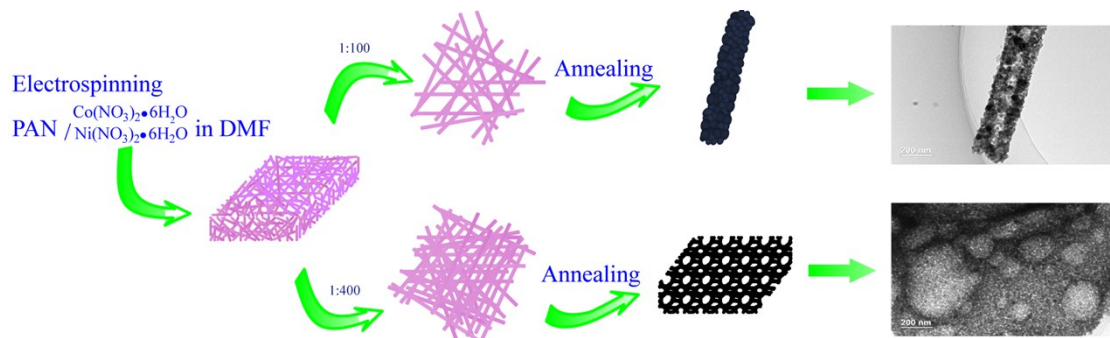

**Fig. S2** Schematic illustration of the formation of different  $\text{NiCo}_2\text{O}_4$  morphologies achieved from different precursor solutions (NP-100 and NP-400).

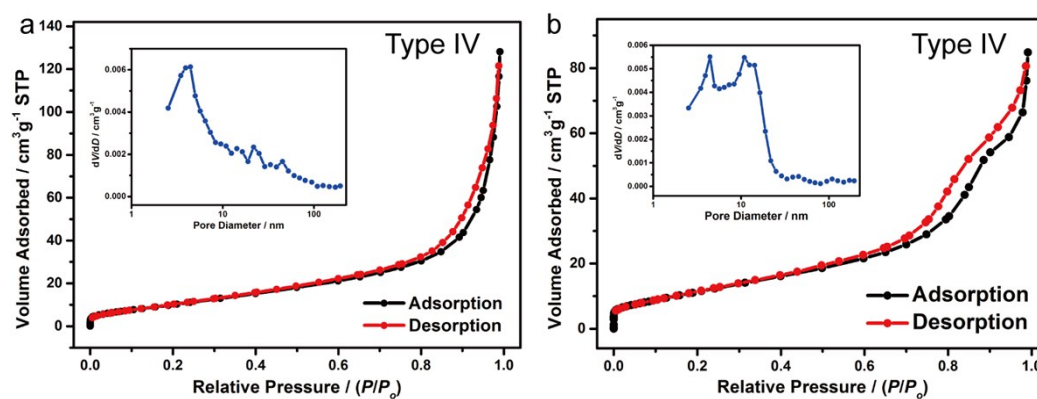

**Fig. S3**  $\text{N}_2$  adsorption-desorption isotherms for: (a) NP-100 and (b) NP-400. Insets show the pore size distributions.

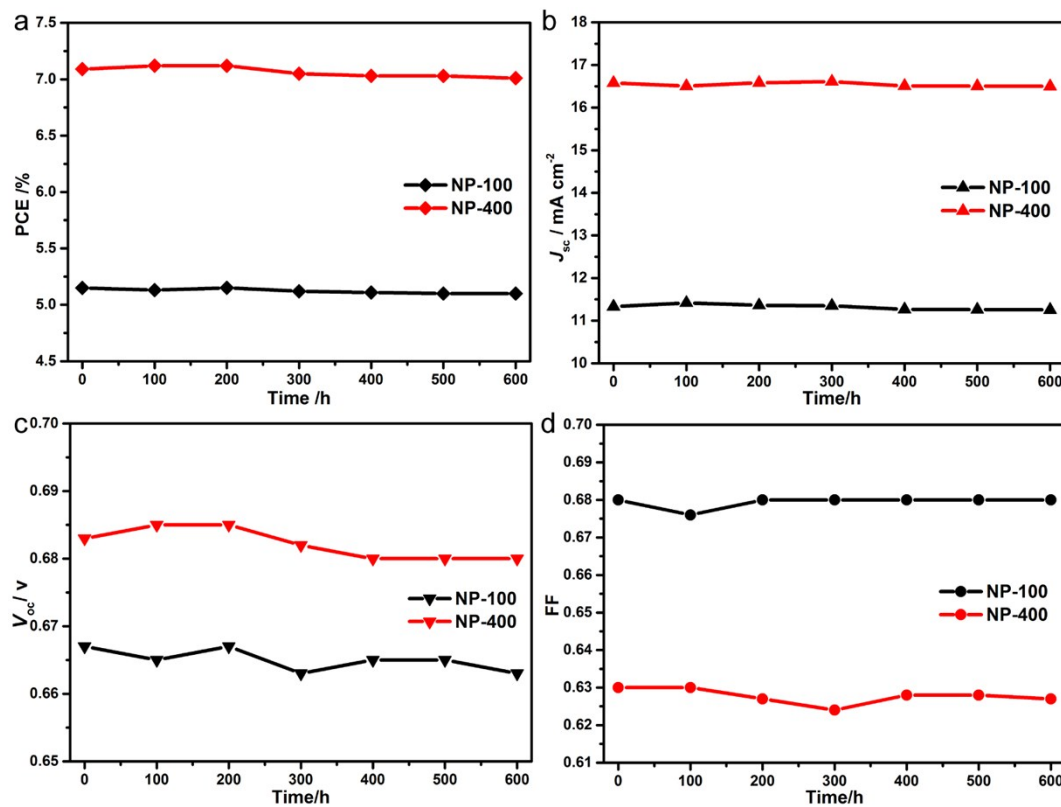

**Fig. S4** Photovoltaic parameters of NP-100 and NP-400 CEs measured under continuous AM 1.5G illumination of sun light.
